# Supplementary material for: A Comparison of the Attitudes to Influenza Vaccination Held by Nursing, Midwifery, Pharmacy, and Public Health Students and Their Knowledge of Viral Infections
Source: MDPI journal article supplement (doi:10.3390/vaccines8030516), 2020-09-09
Supplement: s1 [file s1]

**Table S1. Prevalence of vaccination stratified by sex, age, year of study, place of residence, smoking cigarette, status health, taking medication in Public health**

| Influenza vaccination                        | No         | Yes        |              |             |
|----------------------------------------------|------------|------------|--------------|-------------|
| Total                                        | 45 (51.1%) | 43 (48.9%) |              |             |
|                                              |            | Once       | Irregularly* | Regularly** |
| <b>Sex</b>                                   |            |            |              |             |
| Female                                       | 44 (55.0%) | 7 (8.8%)   | 29 (36.3%)   | 0 (0.0%)    |
| Male                                         | 1 (12.5%)  | 3 (37.5%)  | 3 (37.5%)    | 1 (12.5%)   |
| <b>Age</b>                                   |            |            |              |             |
| 18-20y                                       | 11 (36.7%) | 4 (13.3%)  | 15 (50.0%)   | 0 (0.0%)    |
| 21-22y                                       | 17 (54.8%) | 5 (15.1%)  | 8 (25.8%)    | 1 (3.2%)    |
| 23-24y                                       | 17 (65.4%) | 1 (3.8%)   | 8 (30.8%)    | 0 (0.0%)    |
| ≥25y                                         | 0 (0.0%)   | 0 (0.0%)   | 1 (100.0%)   | 0 (0.0%)    |
| <b>Year of study</b>                         |            |            |              |             |
| 1st                                          | 8 (26.7%)  | 5 (16.7%)  | 17 (56.7%)   | 0 (0.0%)    |
| 2nd                                          | 17 (63.0%) | 3 (11.1%)  | 6 (22.2%)    | 1 (3.7%)    |
| 3rd                                          | 20 (64.5%) | 2 (6.5%)   | 9 (29.0%)    | 0 (0.0%)    |
| 4th                                          | NA         | NA         | NA           | NA          |
| 5th                                          | NA         | NA         | NA           | NA          |
| <b>Place of residence</b>                    |            |            |              |             |
| rural                                        | 13 (44.8%) | 2 (6.9%)   | 13 (44.8%)   | 1 (3.4%)    |
| city of less than 10,000 r                   | 6 (50.0%)  | 0 (0.0%)   | 6 (50.0%)    | 0 (0.0%)    |
| city from 10,000 to 100,000 r                | 13 (54.2%) | 0 (0.0%)   | 11 (45.8%)   | 0 (0.0%)    |
| city above 100,000 r                         | 13 (56.5%) | 8 (34.8%)  | 2 (8.7%)     | 0 (0.0%)    |
| <b>Cigarette smoking</b>                     |            |            |              |             |
| current smoker                               | 3 (37.5%)  | 1 (12.5%)  | 4 (50.0%)    | 0 (0.0%)    |
| never smoker                                 | 28 (50.9%) | 6 (10.9%)  | 20 (36.4%)   | 1 (1.8%)    |
| ex-smoker                                    | 14 (56.0%) | 3 (12.0%)  | 8 (32.0%)    | 0 (0.0%)    |
| <b>Status health –chronic disease</b>        |            |            |              |             |
| No, any                                      | 34 (49.3%) | 8 (11.6%)  | 26 (37.7%)   | 1 (1.4%)    |
| Yes (total)                                  | 11 (57.9%) | 2 (10.5%)  | 6 (31.6%)    | 0 (0.0%)    |
| Asthma                                       | 0 (0.0%)   | 1 (100.0%) | 0 (0.0%)     | 0 (0.0%)    |
| Allergy                                      | 1 (100.0%) | 0 (0.0%)   | 0 (0.0%)     | 0 (0.0%)    |
| Immune disorders                             | 4 (66.7%)  | 0 (0.0%)   | 2 (33.3%)    | 0 (0.0%)    |
| Thyroid disease                              | 3 (60.0%)  | 1 (20.0%)  | 1 (20.0%)    | 0 (0.0%)    |
| Diabetes                                     | 1 (100.0%) | 0 (0.0%)   | 0 (0.0%)     | 0 (0.0%)    |
| Others                                       | 9 (64.3%)  | 1 (7.1%)   | 4 (28.6%)    | 0 (0.0%)    |
| <b>Taking medication for chronic disease</b> |            |            |              |             |
| No                                           | 36 (50.0%) | 8 (11.1%)  | 27 (37.5%)   | 1 (1.4%)    |
| Yes                                          | 9 (56.3%)  | 2 (12.5%)  | 5 (31.3%)    | 0 (0.0%)    |

\* within last 3 years, \*\* minimum from 3 years, r - residents, NA - Not Applicable

**Table S2. Prevalence of vaccination stratified by sex, age, year of study, place of residence, smoking cigarette, status health, taking medication in Pharmacy**

| <b>Influenza vaccination</b>                 | No               | Yes              |              |             |
|----------------------------------------------|------------------|------------------|--------------|-------------|
| <b>Total</b>                                 | <b>301 (69%)</b> | <b>135 (31%)</b> |              |             |
|                                              |                  | Once             | Irregularly* | Regularly** |
| <b>Sex</b>                                   |                  |                  |              |             |
| Female                                       | 265 (72.6%)      | 44 (12.1%)       | 51 (14.0%)   | 5 (1.4%)    |
| Male                                         | 36 (50.7%)       | 11 (15.5%)       | 18 (25.4%)   | 6(8.5%)     |
| <b>Age</b>                                   |                  |                  |              |             |
| 18-20y                                       | 84 (61.8%)       | 28 (20.6%)       | 22 (16.2%)   | 2 (1.5%)    |
| 21-22y                                       | 123 (69.1%)      | 19 (10.7%)       | 31 (17.4%)   | 5 (2.8%)    |
| 23-24y                                       | 84 (79.2%)       | 7 (6.6%)         | 13 (12.3%)   | 2 (1.9%)    |
| ≥25y                                         | 10 (62.5%)       | 1 (6.3%)         | 3 (18.8%)    | 2 (12.5%)   |
| <b>Year of study</b>                         |                  |                  |              |             |
| 1st                                          | 71 (60.2%)       | 25 (21.2%)       | 20 (16.9%)   | 2 (1.7%)    |
| 2nd                                          | 68 (64.2%)       | 20 (18.9%)       | 14 (13.2%)   | 4 (3.8%)    |
| 3rd                                          | 63 (72.4%)       | 4 (4.6%)         | 18 (20.7%)   | 2 (2.3%)    |
| 4th                                          | 58 (81.7%)       | 3 (4.2%)         | 10 (14.1%)   | 0 (0.0%)    |
| 5th                                          | 41 (75.9%)       | 3 (5.6%)         | 7 (13.0%)    | 3 (5.6%)    |
| <b>Place of residence</b>                    |                  |                  |              |             |
| rural                                        | 91 (77.1%)       | 9 (7.6%)         | 18 (15.3%)   | 0 (0.0%)    |
| city of less than 10,000 r                   | 36 (70.6%)       | 8 (15.7%)        | 7 (13.7%)    | 0 (0.0%)    |
| city from 10,000 to 100,000 r                | 13 (56.5%)       | 4 (17.4%)        | 4 (17.4%)    | 2 (8.7%)    |
| city above 100,000 r                         | 161 (66.0%)      | 34 (13.9%)       | 40 (16.4%)   | 9 (3.7%)    |
| <b>Cigarette smoking</b>                     |                  |                  |              |             |
| current smoker                               | 19 (47.5%)       | 6 (15.0%)        | 15 (37.5%)   | 0 (0.0%)    |
| never smoker                                 | 254 (72.0%)      | 43 (12.2%)       | 49 (13.9%)   | 7 (2.0%)    |
| ex-smoker                                    | 28 (65.1%)       | 6 (14.0%)        | 5 (11.6%)    | 4 (9.3%)    |
| <b>Status health –chronic disease</b>        |                  |                  |              |             |
| No, any                                      | 252 (68.7%)      | 51 (13.9%)       | 55 (15.0%)   | 9 (2.5%)    |
| Yes (total)                                  | 49 (71.0%)       | 4 (5.8%)         | 14 (20.3%)   | 2 (2.9%)    |
| Asthma                                       | 12 (63.2%)       | 2 (10.5%)        | 5 (26.3%)    | 0 (0.0%)    |
| Allergy                                      | 5 (83.3%)        | 0 (0.0%)         | 1 (16.7%)    | 0 (0.0%)    |
| Immune disorders                             | 3 (42.9%)        | 2 (28.6%)        | 2 (28.6%)    | 0 (0.0%)    |
| Thyroid disease                              | 2 (22.2%)        | 0 (0.0%)         | 0 (0.0%)     | 7 (77.8%)   |
| Diabetes                                     | 5 (83.3%)        | 0 (0.0%)         | 1 (16.7%)    | 0 (0.0%)    |
| Others                                       | 38 (80.9%)       | 0 (0.0%)         | 7 (14.9%)    | 2 (4.3%)    |
| <b>Taking medication for chronic disease</b> |                  |                  |              |             |
| No                                           | 249 (68.6%)      | 48 (13.2%)       | 57 (15.7%)   | 9 (2.5%)    |
| Yes                                          | 52 (71.2%)       | 7 (9.6%)         | 12 (16.4%)   | 2 (2.7%)    |

\* within last 3 years, \*\* minimum from 3 years, r - residents, NA - Not Applicable

**Table S3. Prevalence of vaccination stratified by sex, age, year of study, place of residence, smoking cigarette, status health, taking medication in Nursing**

| <b>Influenza vaccination</b>                 | No                 | Yes                |              |             |
|----------------------------------------------|--------------------|--------------------|--------------|-------------|
| <b>Total</b>                                 | <b>309 (69.3%)</b> | <b>137 (30.7%)</b> |              |             |
|                                              |                    | Once               | Irregularly* | Regularly** |
| <b>Sex</b>                                   |                    |                    |              |             |
| Female                                       | 297 (70.9%)        | 82 (19.6%)         | 35 (8.4%)    | 5 (1.2%)    |
| Male                                         | 12 (44.4%)         | 8 (29.6%)          | 6 (22.2%)    | 1 (3.7%)    |
| <b>Age</b>                                   |                    |                    |              |             |
| 18-20y                                       | 108 (64.7%)        | 42 (25.1%)         | 16 (9.6%)    | 1 (0.6%)    |
| 21-22y                                       | 163 (74.1%)        | 42 (19.1%)         | 13 (5.9%)    | 2 (0.9%)    |
| 23-24y                                       | 20 (52.6%)         | 5 (13.2%)          | 11 (28.9%)   | 2 (5.3%)    |
| ≥25y                                         | 18 (85.7%)         | 1 (4.8%)           | 1 (4.8%)     | 1 (4.8%)    |
| <b>Year of study</b>                         |                    |                    |              |             |
| 1st                                          | 113 (62.1%)        | 46 (25.3%)         | 21 (11.5%)   | 2 (1.1%)    |
| 2nd                                          | 100 (66.7%)        | 36 (24.0%)         | 10 (6.7%)    | 4 (2.7%)    |
| 3rd                                          | 96 (84.2%)         | 8 (7.0%)           | 10 (8.8%)    | 0 (0.0%)    |
| 4th                                          | NA                 | NA                 | NA           | NA          |
| 5th                                          | NA                 | NA                 | NA           | NA          |
| <b>Place of residence</b>                    |                    |                    |              |             |
| rural                                        | 122 (76.7%)        | 21 (13.2%)         | 14 (8.8%)    | 2 (1.3%)    |
| city of less than 10,000 r                   | 14 (51.9%)         | 13 (48.1%)         | 0 (0.0%)     | 0 (0.0%)    |
| city from 10,000 to 100,000 r                | 74 (65.5%)         | 30 (26.5%)         | 9 (8.0%)     | 0 (0.0%)    |
| city above 100,000 r                         | 99 (67.3%)         | 26 (17.7%)         | 18 (12.2%)   | 4 (2.7%)    |
| <b>Cigarette smoking</b>                     |                    |                    |              |             |
| current smoker                               | 43 (76.8%)         | 6 (10.7%)          | 4 (7.1%)     | 3 (5.4%)    |
| never smoker                                 | 228 (71.7%)        | 67 (21.1%)         | 21 (6.6%)    | 2 (0.6%)    |
| ex-smoker                                    | 38 (52.8%)         | 17 (23.6%)         | 16 (22.2%)   | 1 (1.4%)    |
| <b>Status health –chronic disease</b>        |                    |                    |              |             |
| No, any                                      | 251 (70.1%)        | 74 (20.7%)         | 32 (8.9%)    | 1 (0.3%)    |
| Yes (total)                                  | 58 (65.9%)         | 16 (18.2%)         | 9 (10.2%)    | 5 (5.7%)    |
| Asthma                                       | 7 (53.8%)          | 0 (0.0%)           | 4 (30.8%)    | 2 (15.4%)   |
| Allergy                                      | 6 (75.0%)          | 2 (25.0%)          | 0 (0.0%)     | 0 (0.0%)    |
| Immune disorders                             | 4 (36.4%)          | 4 (36.4%)          | 2 (18.2%)    | 1 (9.1%)    |
| Thyroid disease                              | 12 (66.7%)         | 3 (16.7%)          | 1 (5.6%)     | 2 (11.1%)   |
| Diabetes                                     | 1 (50.0%)          | 0 (0.0%)           | 1 (50.0%)    | 0 (0.0%)    |
| Others                                       | 40 (68.3%)         | 8 (15.4%)          | 2 (3.8%)     | 2 (3.8%)    |
| <b>Taking medication for chronic disease</b> |                    |                    |              |             |
| No                                           | 248 (69.1%)        | 76 (21.2%)         | 33 (9.2%)    | 2 (0.6%)    |
| Yes                                          | 61 (70.1%)         | 14 (16.1%)         | 8 (9.2%)     | 4 (4.6%)    |

\* within last 3 years, \*\* minimum from 3 years, r - residents, NA - Not Applicable

**Table S4. Prevalence of vaccination stratified by sex, age, year of study, place of residence, smoking cigarette, status health, taking medication in Midwifery**

| <b>Influenza vaccination</b>                 | No                 | Yes               |              |             |
|----------------------------------------------|--------------------|-------------------|--------------|-------------|
| <b>Total</b>                                 | <b>125 (74.9%)</b> | <b>42 (25.1%)</b> |              |             |
|                                              |                    | Once              | Irregularly* | Regularly** |
| <b>Sex</b>                                   |                    |                   |              |             |
| Female                                       | 125 (74.9%)        | 20 (12.0%)        | 18 (10.8%)   | 4 (2.4%)    |
| Male                                         | 0 (0.0%)           | 0 (0.0%)          | 0 (0.0%)     | 0 (0.0%)    |
| <b>Age</b>                                   |                    |                   |              |             |
| 18-20y                                       | 41 (65.1%)         | 11 (17.5%)        | 10 (15.9%)   | 1 (1.6%)    |
| 21-22y                                       | 72 (81.8%)         | 9 (10.2%)         | 5 (5.7%)     | 2 (2.3%)    |
| 23-24y                                       | 8 (72.7%)          | 0 (0.0%)          | 2 (18.2%)    | 1 (9.1%)    |
| ≥25y                                         | 4 (80.0%)          | 0 (0.0%)          | 1 (20.0%)    | 0 (0.0%)    |
| <b>Year of study</b>                         |                    |                   |              |             |
| 1st                                          | 33 (63.5%)         | 8 (15.4%)         | 9 (17.3%)    | 2 (3.8%)    |
| 2nd                                          | 46 (76.7%)         | 12 (20.0%)        | 2 (3.3%)     | 0 (0.0%)    |
| 3rd                                          | 46 (83.6%)         | 0 (0.0%)          | 7 (12.7%)    | 2 (3.6%)    |
| 4th                                          | NA                 | NA                | NA           | NA          |
| 5th                                          | NA                 | NA                | NA           | NA          |
| <b>Place of residence</b>                    |                    |                   |              |             |
| rural                                        | 42 (75.0%)         | 5 (8.9%)          | 7 (12.5%)    | 2 (3.6%)    |
| city of less than 10,000 r                   | 9 (69.2%)          | 3 (23.1%)         | 1 (7.7%)     | 0 (0.0%)    |
| city from 10,000 to 100,000 r                | 34 (77.3%)         | 5 (11.4%)         | 4 (9.1%)     | 1 (2.3%)    |
| city above 100,000 r                         | 40 (74.1%)         | 7 (13.0%)         | 6 (11.1%)    | 1 (1.9%)    |
| <b>Cigarette smoking</b>                     |                    |                   |              |             |
| current smoker                               | 8 (66.7%)          | 1 (8.3%)          | 1 (8.3%)     | 2 (16.7%)   |
| never smoker                                 | 90 (73.8%)         | 15 (12.3%)        | 15 (12.3%)   | 2 (1.6%)    |
| ex-smoker                                    | 27 (81.8%)         | 4 (12.1%)         | 2 (6.1%)     | 0 (0.0%)    |
| <b>Status health –chronic disease</b>        |                    |                   |              |             |
| No, any                                      | 95 (72.0%)         | 17 (12.9%)        | 16 (12.1%)   | 4 (3.0%)    |
| Yes (total)                                  | 30 (85.7%)         | 3 (8.6%)          | 2 (5.7%)     | 0 (0.0%)    |
| Asthma                                       | 3 (100.0%)         | 0 (0.0%)          | 0 (0.0%)     | 0 (0.0%)    |
| Allergy                                      | 3 (75.0%)          | 1 (25.0%)         | 0 (0.0%)     | 0 (0.0%)    |
| Immune disorders                             | 1 (50.0%)          | 0 (0.0%)          | 1 (50.0%)    | 0 (0.0%)    |
| Thyroid disease                              | 8 (80.0%)          | 1 (10.0%)         | 1 (10.0%)    | 0 (0.0%)    |
| Diabetes                                     | 0 (0.0%)           | 0 (0.0%)          | 0 (0.0%)     | 0 (0.0%)    |
| Others                                       | 22 (84.6%)         | 2 (7.7%)          | 2 (7.7%)     | 0 (0.0%)    |
| <b>Taking medication for chronic disease</b> |                    |                   |              |             |
| No                                           | 101 (72.7%)        | 18 (2.9%)         | 16 (11.5%)   | 4 (2.9%)    |
| Yes                                          | 24 (85.7%)         | 2 (7.1%)          | 2 (7.1%)     | 0 (0.0%)    |

\* within last 3 years, \*\* minimum from 3 years, r - residents, NA - Not Applicable

**Table S5. Knowledge about influenza and common cold among unvaccinated and vaccinated students.**

| Self-choose answer        |  |  | Major      |              |            |              |             |              |               |              |  |
|---------------------------|--|--|------------|--------------|------------|--------------|-------------|--------------|---------------|--------------|--|
|                           |  |  | Nursing    |              | Midwifery  |              | Pharmacy    |              | Public health |              |  |
|                           |  |  | vaccinated | unvaccinated | vaccinated | unvaccinated | vaccinated  | unvaccinated | vaccinated    | unvaccinated |  |
| Number of correct answers |  |  |            |              |            |              |             |              |               |              |  |
|                           |  |  |            |              |            |              |             |              |               |              |  |
|                           |  |  |            |              |            |              |             |              |               |              |  |
| 0-1 correct answers       |  |  | 93 (67.9%) | 140 (53.3%)  | 24 (57.2%) | 42 (33.6%)   | 80 (59.2%)  | 125 (41.5%)  | 28 (69.8%)    | 17 (37.7%)   |  |
| 2-3 correct answers       |  |  | 44 (32.1%) | 169 (46.7%)  | 18 (42.8%) | 83 (66.4%)   | 55 (40.8%)  | 176 (58.5%)  | 13 (30.2%)    | 28 (62.3%)   |  |
| Number of wrong answers   |  |  |            |              |            |              |             |              |               |              |  |
| 0-1-2 wrong answers       |  |  | 137 (100%) | 308 (99,67%) | 42 (100%)  | 125 (100%)   | 133 (98.5%) | 293 (97.3%)  | 43(100%)      | 45 (100%)    |  |
| 3-4 wrong answers         |  |  | 0 (0.0%)   | 1 (0.3%)     | 0 (0.0%)   | 0 (0.0%)     | 2 (1.5%)    | 8 (2.7%)     | 0 (0.0%)      | 0 (0.0%)     |  |
